# Supplementary material for: Assessing the Association between Thermotolerant Coliforms in Drinking Water and Diarrhea: An Analysis of Individual–Level Data from Multiple Studies
Source: PubMed Central journal article supplement (PMC5047765; doi:10.1289/ehp156), 2016-05-10
Supplement: EHP156.s001.acco.pdf [file EHP156.s001.acco.pdf]

**Note to readers with disabilities:** *EHP* strives to ensure that all journal content is accessible to all readers. However, some figures and Supplemental Material published in *EHP* articles may not conform to [508 standards](#) due to the complexity of the information being presented. If you need assistance accessing journal content, please contact [ehp508@niehs.nih.gov](mailto:ehp508@niehs.nih.gov). Our staff will work with you to assess and meet your accessibility needs within 3 working days.

## **Supplemental Material**

### **Assessing the Association between Thermotolerant Coliforms in Drinking Water and Diarrhea: An Analysis of Individual Level Data from Multiple Studies**

James Hodge, Howard H. Chang, Sophie Boisson, Simon M. Collin, Rachel Peletz, and Thomas Clasen

#### **Table of Contents**

**Table S1:** Details of Methods for Studies from which Data was Obtained

**Table S2:** Adjusted Odds Ratios of Diarrhea for Log 10 TTC / 100ml by Treatment Status

**Table S3:** Adjusted Odds Ratios for Diarrhea for Log 10 TTC / 100mL

**Table S1: Details of Methods for Studies from which Data was Obtained**

| Author          | Study      | Study Design    | Follow-up Duration | Frequency of Follow-up | Study Time-Frame      | Intervention                       | Additional Details                                                                                                                                                                                                                                                         |
|-----------------|------------|-----------------|--------------------|------------------------|-----------------------|------------------------------------|----------------------------------------------------------------------------------------------------------------------------------------------------------------------------------------------------------------------------------------------------------------------------|
| Peletz, et al.  | Zambia CS  | Cross-sectional | -                  | -                      | Nov. 2009 - Apr. 2010 | -                                  | Water samples were collected and diarrhea cases for the preceding seven days were obtained during each household visit.                                                                                                                                                    |
| Boisson, et al. | Ethiopia   | RCT             | 5 months           | Fortnightly            | Oct. 2007 - June 2008 | Portable membrane filter           | Households were visited 10 times in total and diarrhea cases for the preceding 7 days were recorded. Monthly, a 25% random subsample of filters was selected and water samples were obtained.                                                                              |
| Clasen, et al.  | Bolivia    | RCT             | 5 months           | Monthly                | June - Oct. 2003      | Ceramic filter                     | Each participating household was visited 5 times during follow up. Water samples were collected during the first two household visits. At each visit, the female head of household was about diarrhea status for all household members for the 7 days preceding the visit. |
| Clasen, et al.  | Colombia   | RCT             | 6 months           | Six week intervals     |                       | Ceramic filter                     | Each participating household was visited 4 times at approximately 6 week intervals. Water samples and diarrhea prevalence over the previous seven days were recorded at each visit.                                                                                        |
| Boisson, et al. | DR Congo   | RCT             | 12 months          | Monthly                | Apr. 2008 - July 2009 | Membrane filter                    | Female heads of household were interviewed at each follow-up visit and any diarrhea cases over the past 7 days were recorded. At each follow-up point, water samples were collected from 60 households (30 in each arm).                                                   |
| Peletz, et al.  | Zambia RCT | RCT             | 7-12 months        | Monthly                | Apr. 2010 - July 2011 | Membrane filter                    | Households were visited 7 to 12 times depending on when they were enrolled. Water samples were collected and diarrhea cases over the preceding 7 days were recorded at each household visit.                                                                               |
| Clasen, et al.  | India      | RCT             | 28 months          | Every 3 months         | June 2011 - Oct. 2013 | Latrine promotion and construction | Diarrhea cases for the previous 7 days were recorded at each household visit. At each follow-up period, 20% of participating households were randomly selected for sampling and testing of household drinking water.                                                       |

**Table S2: Adjusted Odds Ratios of Diarrhea for Log 10 TTC / 100ml by Treatment Status<sup>a</sup>**

| Study                 | All Ages           |         | Children Under 5  |         |
|-----------------------|--------------------|---------|-------------------|---------|
|                       | Adj. OR (95% CI)   | p-value | Adj. OR (95% CI)  | p-value |
| Ethiopia              |                    |         |                   |         |
| Intervention          | 1.26 (0.65, 2.46)  | 0.488   | 1.32 (0.57, 3.11) | 0.514   |
| Control               | 1.47 (0.99, 2.19)  | 0.059   | 0.99 (0.54, 1.80) | 0.969   |
| Bolivia <sup>b</sup>  |                    |         |                   |         |
| Intervention          |                    |         |                   |         |
| Control               | 2.90 (0.47, 17.89) | 0.252   | 0.82 (0.09, 7.91) | 0.865   |
| Colombia              |                    |         |                   |         |
| Intervention          | 1.71 (1.24, 2.36)  | 0.001   | 1.93 (1.21, 3.07) | 0.006   |
| Control               | 1.55 (0.87, 2.78)  | 0.137   | 0.88 (0.38, 2.09) | 0.786   |
| Zambia RCT            |                    |         |                   |         |
| Intervention          | 1.89 (1.56, 2.28)  | <0.001  | 1.68 (1.34, 2.11) | <0.001  |
| Control               | 1.12 (0.92, 1.36)  | 0.261   | 1.08 (0.87, 1.34) | 0.483   |
| DR Congo              |                    |         |                   |         |
| Intervention          | 1.37 (1.14, 1.64)  | 0.001   | 1.60 (1.21, 2.11) | 0.001   |
| Control               | 1.15 (0.87, 1.51)  | 0.319   | 1.20 (0.84, 1.70) | 0.318   |
| India                 |                    |         |                   |         |
| Intervention          | 1.04 (0.97, 1.12)  | 0.276   | 1.12 (0.99, 1.27) | 0.072   |
| Control               | 1.05 (0.97, 1.12)  | 0.219   | 1.11 (0.99, 1.25) | 0.064   |
| Combined <sup>c</sup> |                    |         |                   |         |
| Intervention          | 1.17 (1.10, 1.25)  | <0.001  | 1.26 (1.15, 1.39) | <0.001  |
| Control               | 1.07 (1.01, 1.14)  | 0.021   | 1.09 (1.00, 1.19) | 0.041   |
| Combined Except India |                    |         |                   |         |
| Intervention          | 1.64 (1.46, 1.84)  | <0.001  | 1.63 (1.41, 1.91) | <0.001  |
| Control               | 1.14 (1.02, 1.29)  | 0.021   | 1.09 (0.95, 1.25) | 0.221   |

RCT = randomized, controlled trial

<sup>a</sup>All models were adjusted for categorical ages (<5, 5-15, >15) and season (rainy/dry) except Bolivia which was adjusted only for age because all observations occurred in the dry season.

<sup>b</sup>Models for the Intervention group for the Bolivia study did not have sufficient numbers in each group to produce a reliable estimate.

<sup>c</sup>Combined data includes the Zambia Cross-Sectional Study data as part of the control group.

**Table S3: Adjusted Odds Ratios for Diarrhea for Log 10 TTC / 100mL<sup>a</sup>**

| Study                              | All Ages          |         |                                       | Children <5       |         |                                       |
|------------------------------------|-------------------|---------|---------------------------------------|-------------------|---------|---------------------------------------|
|                                    | Adj. OR (95% CI)  | p-value | Treatment Status p-value <sup>b</sup> | Adj. OR (95% CI)  | p-value | Treatment Status p-value <sup>b</sup> |
| Ethiopia                           | 1.42 (1.00, 2.01) | 0.049   | 0.767                                 | 1.10 (0.71, 1.71) | 0.670   | 0.491                                 |
| Bolivia                            | 2.02 (0.48, 8.41) | 0.334   | 0.736                                 | 0.78 (0.14, 4.24) | 0.773   | 0.387                                 |
| Colombia                           | 1.69 (1.28, 2.24) | <0.001  | 0.497                                 | 1.59 (1.04, 2.41) | 0.030   | 0.505                                 |
| Zambia RCT                         | 1.48 (1.29, 1.70) | <0.001  | 0.443                                 | 1.34 (1.14, 1.57) | <0.001  | 0.484                                 |
| DR Congo                           | 1.24 (1.07, 1.43) | 0.004   | 0.398                                 | 1.34 (1.09, 1.64) | 0.005   | 0.398                                 |
| India                              | 1.04 (0.99, 1.10) | 0.095   | 0.236                                 | 1.12 (1.03, 1.22) | 0.009   | 0.192                                 |
| Combined <sup>c</sup>              | 1.12 (1.07, 1.17) | <0.001  | 0.100                                 | 1.18 (1.10, 1.25) | <0.001  | 0.051                                 |
| Combined Except India <sup>c</sup> | 1.36 (1.25, 1.47) | <0.001  | 0.776                                 | 1.31 (1.18, 1.45) | <0.001  | 0.480                                 |

RCT= randomized, controlled trial

<sup>a</sup> All studies were adjusted for categorical ages (<5, 5-15, >15), treatment status (intervention/control) and, season (rainy/dry) except for Bolivia which was only adjusted for age because all observations occurred in the dry season. The Zambia Cross-Sectional Study is excluded from this table because there were no study arms and thus the results are the same as those reported in Table 5.

<sup>b</sup> P-values for the categorical study (control/intervention) parameter in each model

<sup>c</sup> Combined data includes the Zambia Cross-Sectional Study data as part of the control group
